# Supplementary material
Source: PubMed Central journal article supplement (PMC4238926)
Supplement: NIHMS635587-supplement-01.pdf [file NIHMS635587-supplement-01.pdf]

Table S1. Characteristics of genomic regions analyzed.

| Region             | Genomic Location          | Surveyed Length | SNPs present |
|--------------------|---------------------------|-----------------|--------------|
| 2q                 | 2:95,700,001-242,951,149  | 147.3 Mb        | 130,354      |
| 21q                | 21:13,200,001-46,944,323  | 33.7 Mb         | 324,683      |
| Low recombination  | 12:38,626,477-39,126,476  | 500 Kb          | 54           |
| High recombination | 22:25,500,000-26,000,000  | 500 Kb          | 138          |
| Gene rich          | 18:19,500,000-20,000,000  | 500 Kb          | 43           |
| Gene poor          | 21:23,500,000-24,000,000  | 500 Kb          | 59           |
| ChrX, p-arm        | X:32,000,000-X:32,500,000 | 500 Kb          | 37           |
| ChrX, q-arm        | X:125,500,000-126,000,000 | 500 Kb          | 23           |
